# Supplementary material for: Implementing Multidisciplinary, Team-Based Care in an Academic Outpatient Psychiatry Department
Source: Atypon-hosted journal article supplement (doi:10.1176/appi.ps.202200030), 2022-04-27
Supplement: appi.ps.202200030.ds001.pdf [file appi.ps.202200030.ds001.pdf]

**Supplemental Table 1: Weekly workloads by role group**

| <b>Role Group</b> | <b>New consultations</b> | <b>Follow-up visits</b> | <b>Protected time (including documentation)</b> | <b>Other</b>                                                                          |
|-------------------|--------------------------|-------------------------|-------------------------------------------------|---------------------------------------------------------------------------------------|
| MD                | 7                        | 38                      | 15 hours                                        | Staffs some NP consultations                                                          |
| PhD               | 5-7                      | 20                      | 13.5 hours                                      | Triage (shared with SW)                                                               |
| NP                | 5                        | 38                      | 8 hours                                         |                                                                                       |
| SW                | 0                        | 10                      | 5.5 hours                                       | Case management, Triage (shared with PhD)                                             |
| MA                | 0                        | 0                       | 2.5 hours                                       | Works with MD and NP primarily/<br>patient-reported outcome measures for all patients |
